# Supplementary material for: Fentanyl decreases blood oxygen more than furanylfentanyl despite similar effects on breathing
Source: Research Square preprint supplement (doi:10.21203/rs.3.rs-8398857/v1), 2026-01-12

**PSYCHOPHARMACOLOGY JOURNAL**

**SUPPLEMENTARY MATERIAL FOR:**

**Fentanyl decreases blood oxygen more than furanylfentanyl despite similar effects on breathing**

Catherine Demery1, Sierra C. Moore1, Kelsey E. Kochan1, Mengchu Li1, Thomas D. Prince1, Benjamin M. Clements1, Zhongqi Chen2, Jessica R. Whitaker-Fornek1, Erica S. Levitt1,3, Jessica P. Anand1*, and John R. Traynor1,2*

*Co-communicating authors

Communicating Author:

John R. Traynor, PhD

[jtraynor@umich.edu](mailto:jtraynor@umich.edu)

1Edward F. Domino Research Center, Department of Pharmacology, University of Michigan Medical School, 1150 W. Medical Center Dr., Ann Arbor, MI, 48109, USA

2Department of Medicinal Chemistry, University of Michigan College of Pharmacy, 428 Church St., Ann Arbor, MI, 48109, USA


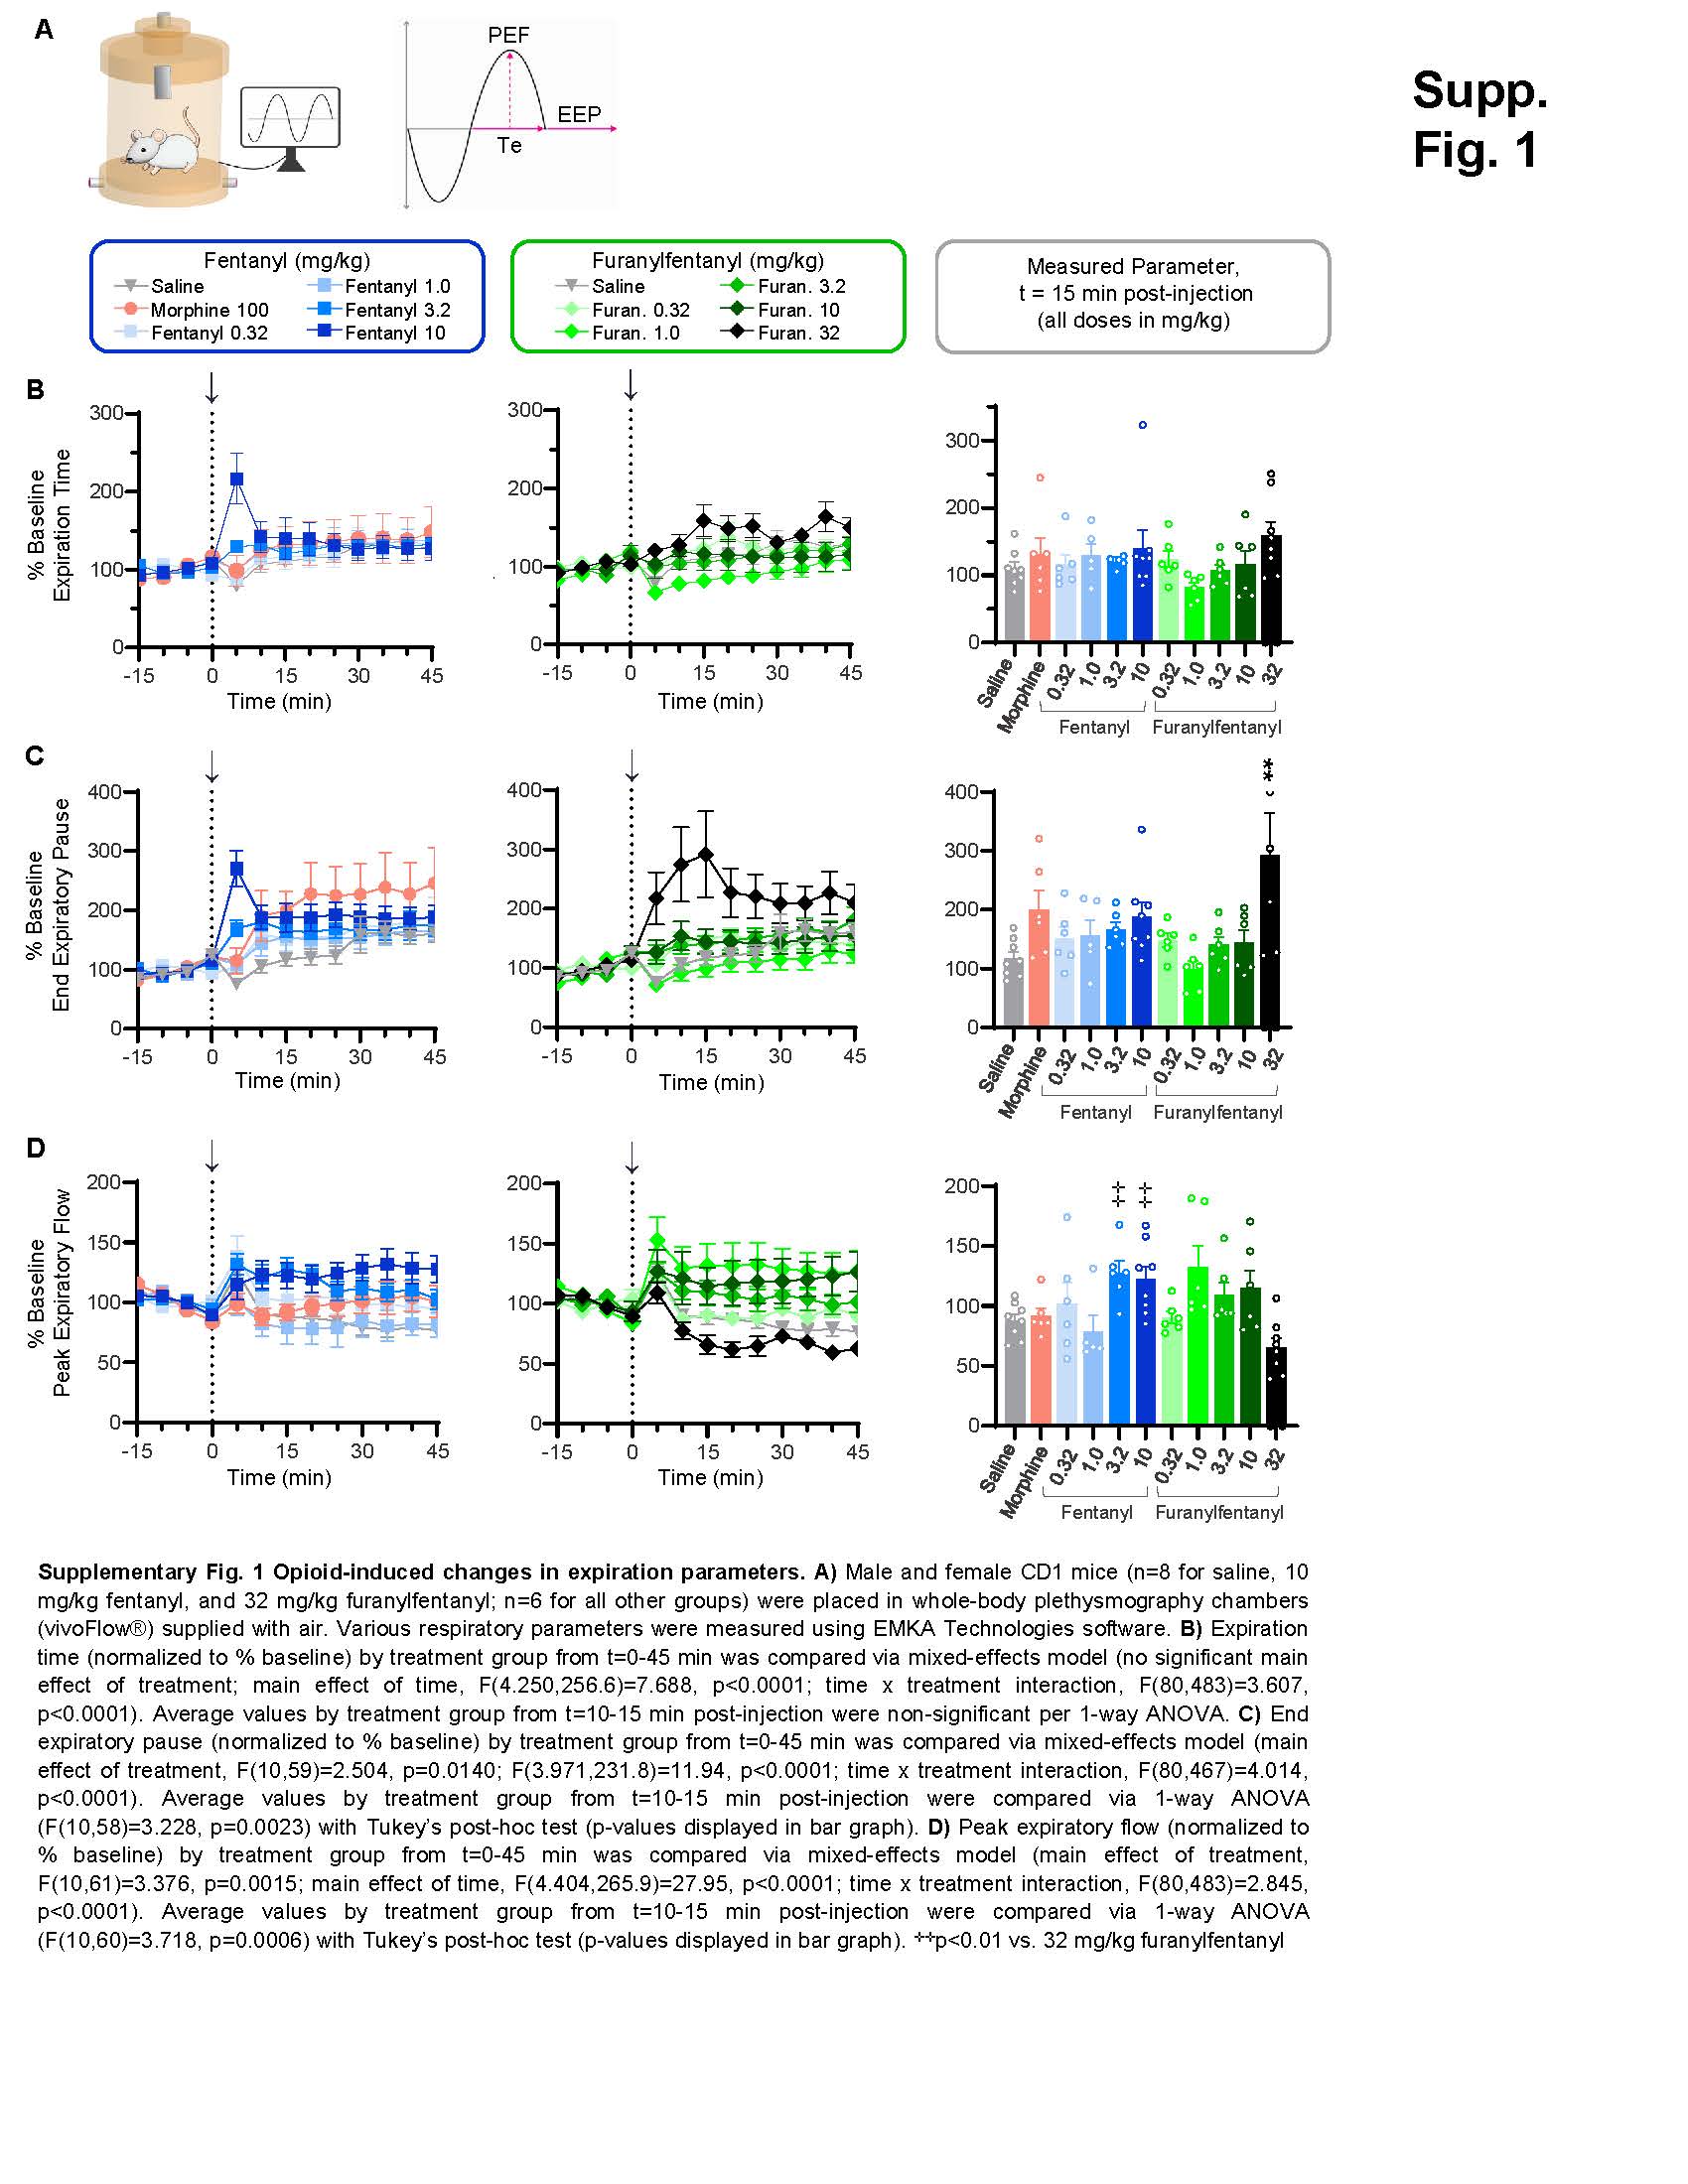


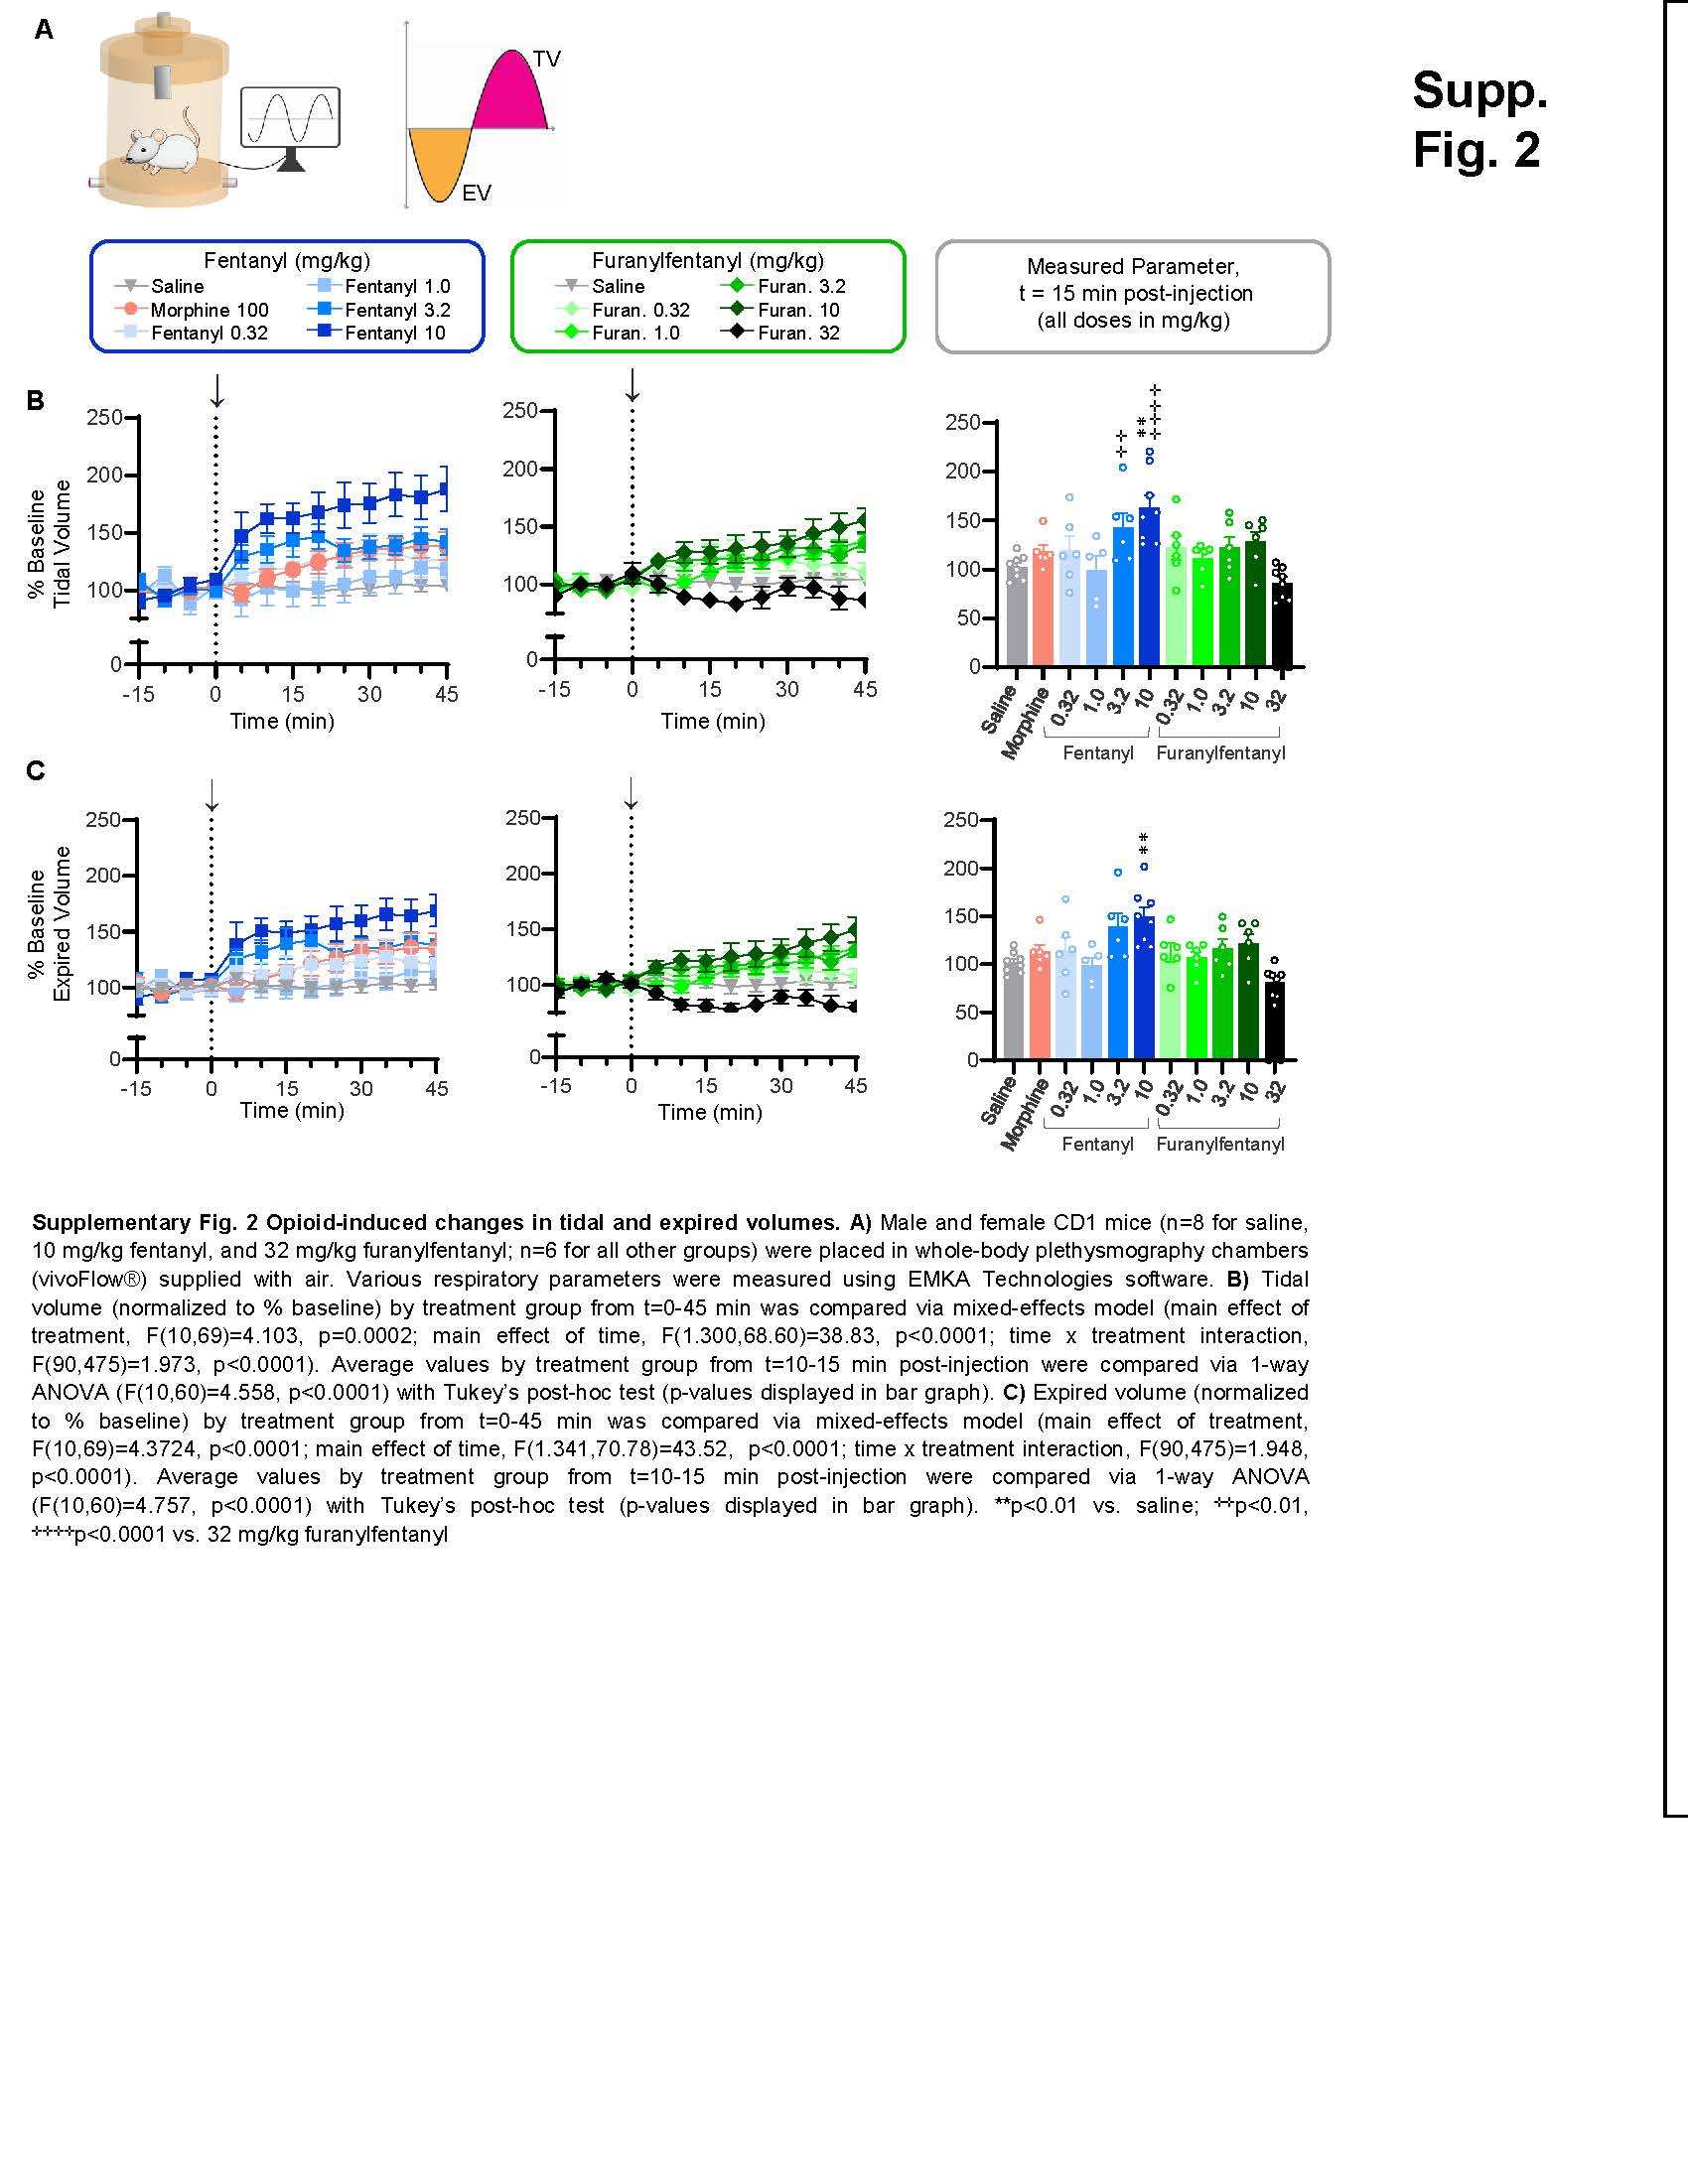


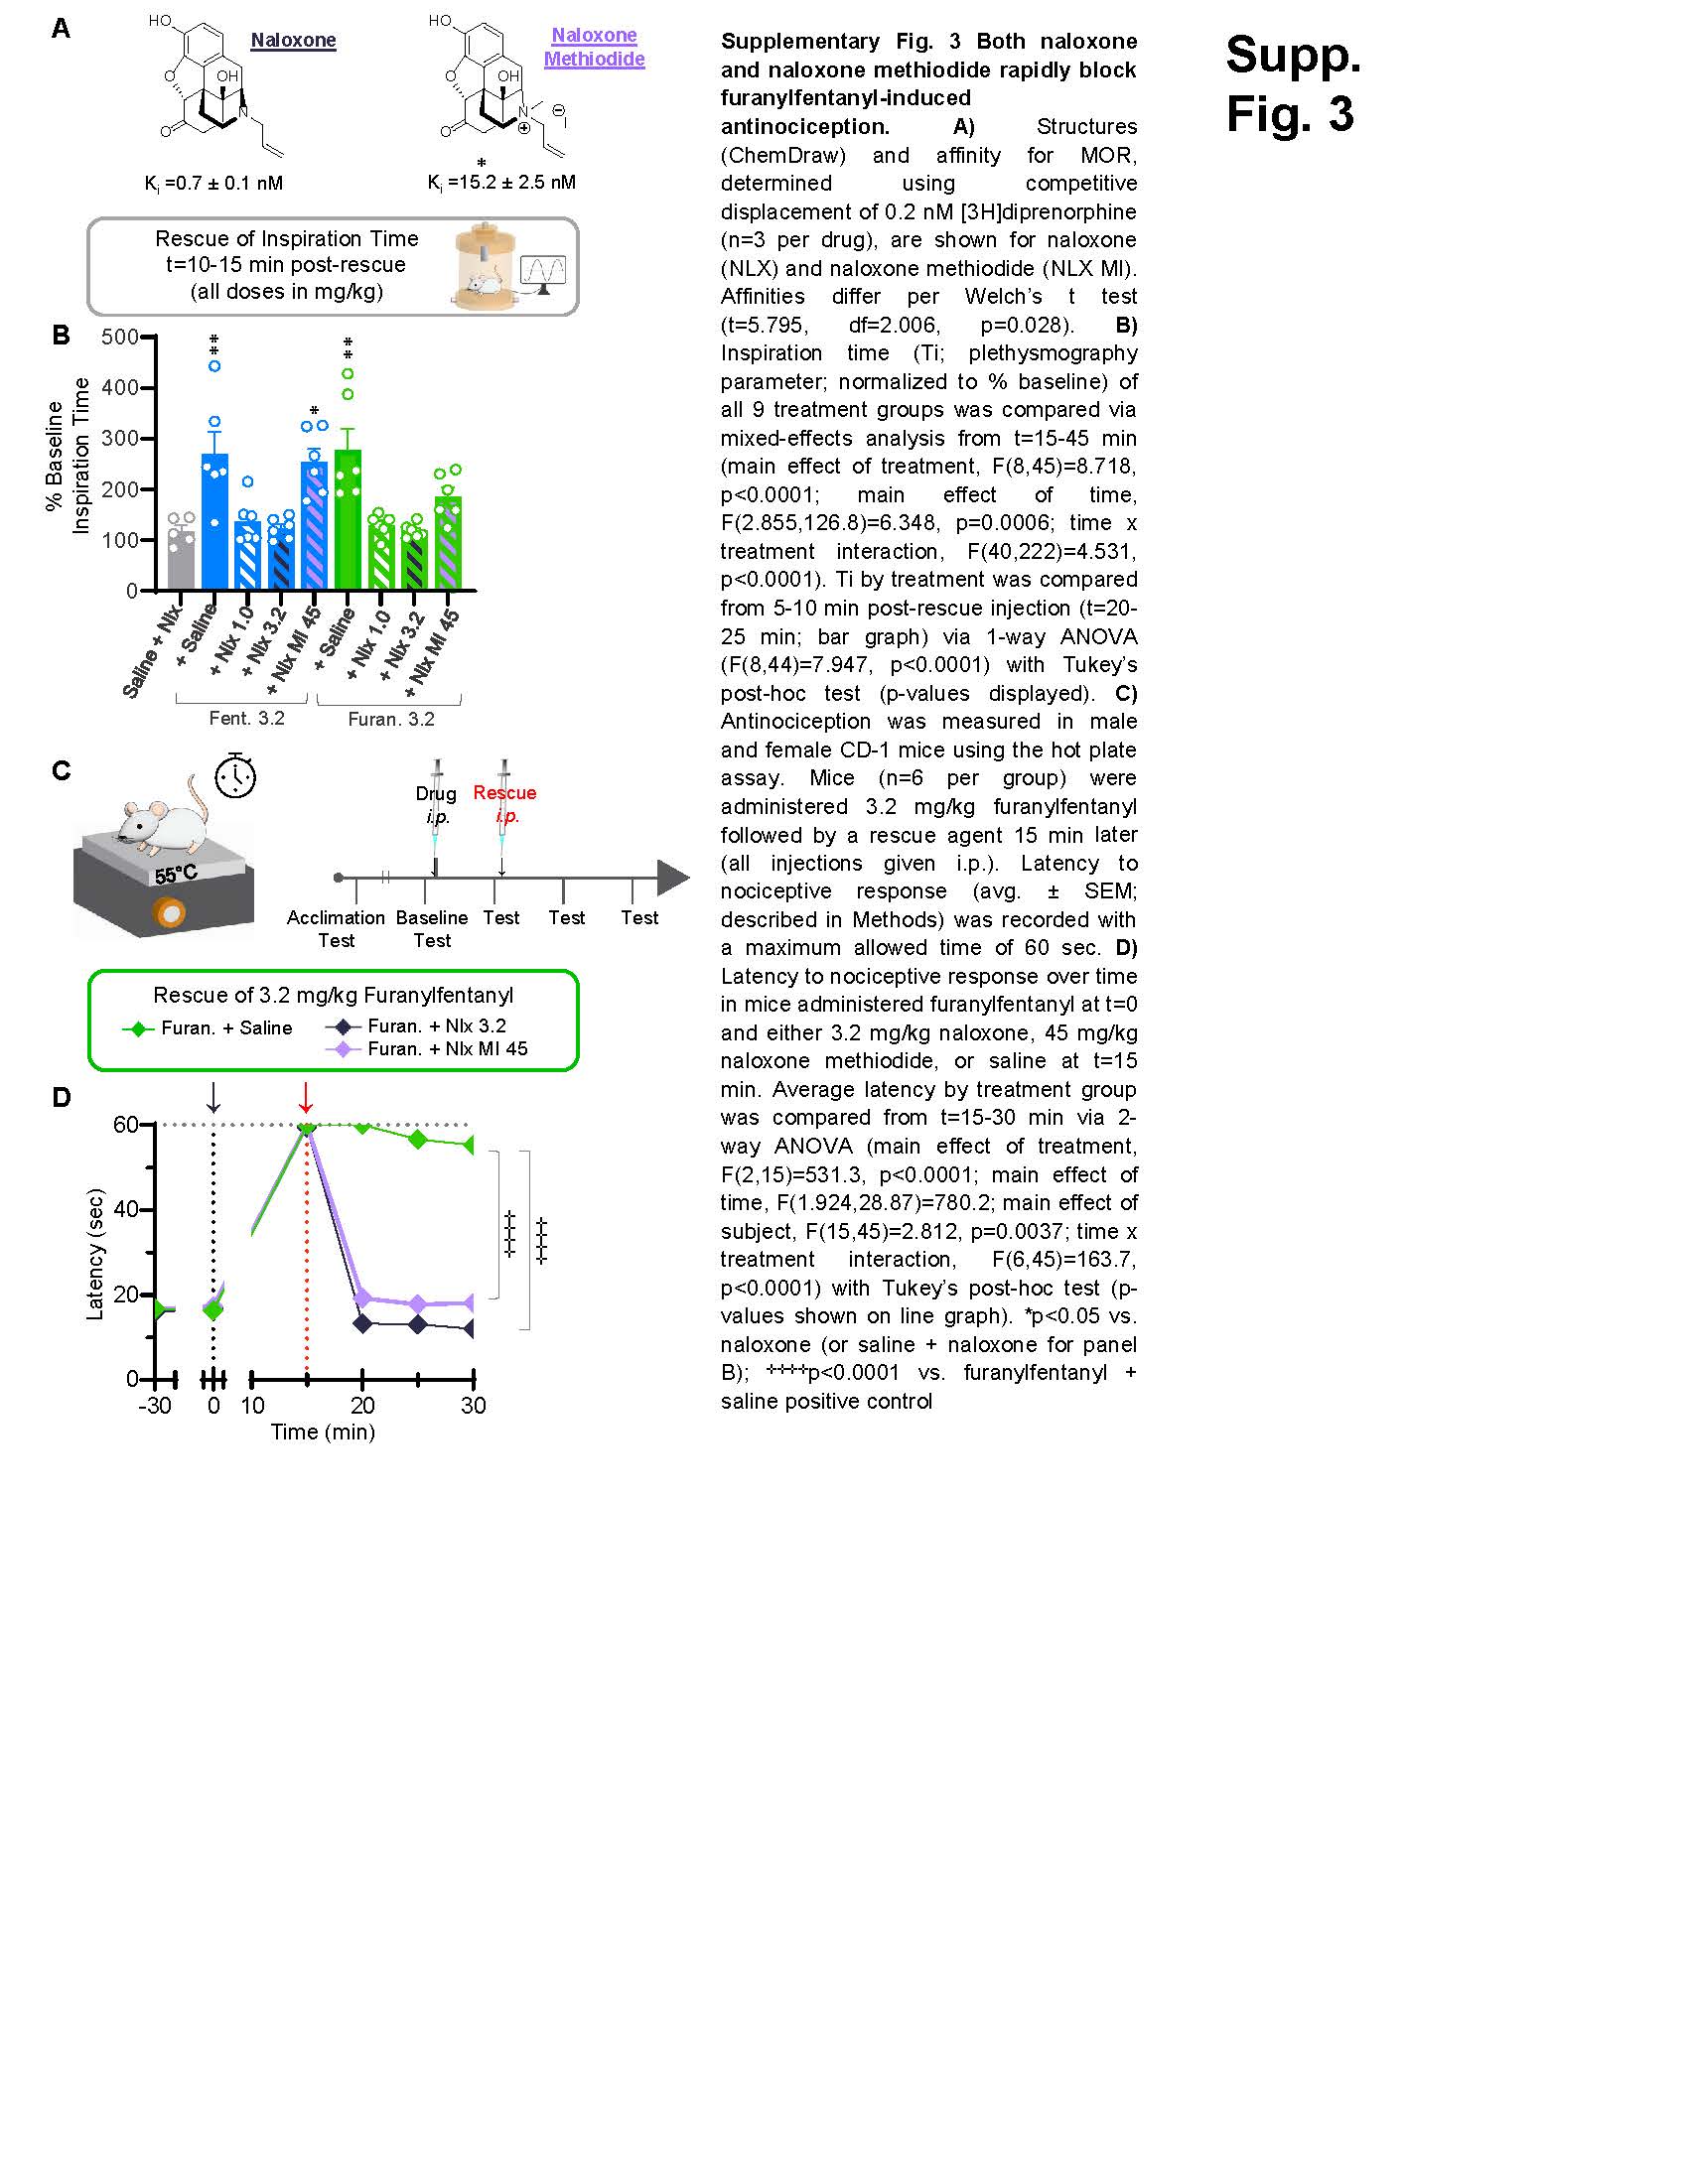

Supplement: Supplementary file 1 [file 8846f4a7dcf0b144a07e09de.docx]
